# Supplementary material for: Racemic charge-transfer complexes of a helical polycyclic aromatic hydrocarbon molecule
Source: Royal Society of Chemistry journal article supplement (doi:10.1039/c7ce00763a), 2017-01-01
Supplement: c7ce00763a1.pdf [file c7ce00763a1.pdf]

*Electronic supplementary information (ESI)*

**Racemic Charge-Transfer Complexes of Helical Polycyclic  
Aromatic Hydrocarbon Molecule**

**Yukihiro Yoshida,<sup>\*ab</sup> Yuto Nakamura,<sup>c</sup> Hideo Kishida,<sup>c</sup> Hiromi Hayama,<sup>a</sup>  
Yoshiaki Nakano,<sup>bd</sup> Hideki Yamochi<sup>bd</sup> and Gunzi Saito<sup>ae</sup>**

<sup>a</sup> *Faculty of Agriculture, Meijo University, Nagoya 468-8502, Japan*

<sup>b</sup> *Division of Chemistry, Graduate School of Science, Kyoto University, Kyoto 606-8502,  
Japan*

<sup>c</sup> *Department of Applied Physics, Nagoya University, Nagoya 464-8603, Japan*

<sup>d</sup> *Research Center for Low Temperature and Materials Sciences, Kyoto University, Sakyo-  
ku, Kyoto 606-8501, Japan*

<sup>e</sup> *Toyota Physical and Chemical Research Institute, Nagakute 480-1192, Japan*

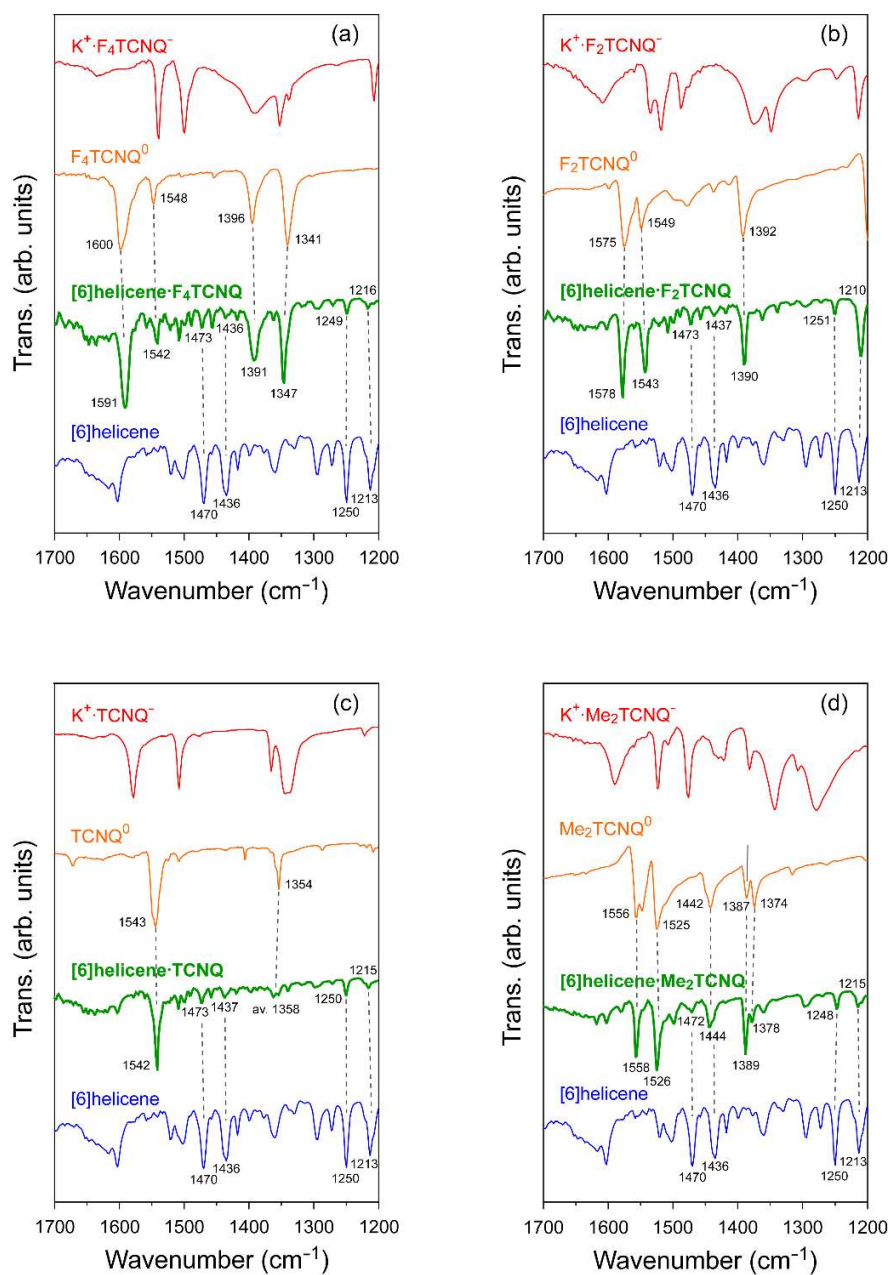

**Fig. S1** FT-IR spectra of [6]helicene-based CT complexes combined with (a) F<sub>4</sub>TCNQ (**1**), (b) F<sub>2</sub>TCNQ (**2**), (c) TCNQ (**3**), and (d) Me<sub>2</sub>TCNQ (**4**) (green lines), together with corresponding monoanionic TCNQ species (red lines), neutral TCNQ species (orange lines), and neutral [6]helicene (blue lines), measured in the dispersed KBr pellet.
